# Supplementary material
Source: PubMed Central journal article supplement (PMC6916255)
Supplement: NIHMS1059319-supplement-SupTable1.pdf [file NIHMS1059319-supplement-SupTable1.pdf]

**Supplementary Table 1.** Estimates of model parameters for A)  $a_x$  and  $b_x$  in Lee carter model, B)  $d$  in Lee carter model, C-E)  $u_x$ ,  $b_x$ , and  $\alpha_x$  in autoregression model

**Panel A:**  $a_x$  and  $b_x$  in Lee carter model

| Age | Total mortality |         | Cause-specific mortality |        | Mortality from healthy state |         | Mortality from unhealthy state |         | Incidence |         |
|-----|-----------------|---------|--------------------------|--------|------------------------------|---------|--------------------------------|---------|-----------|---------|
|     | $a_x$           | $b_x$   | $a_x$                    | $b_x$  | $a_x$                        | $b_x$   | $a_x$                          | $b_x$   | $a_x$     | $b_x$   |
| 65  | -4.16           | 0.2579  | -5.53                    | 0.0350 | -4.36                        | 0.2604  | -3.21                          | 0.1629  | -5.74     | 0.0955  |
| 66  | -4.09           | 0.2695  | -5.36                    | 0.0402 | -4.29                        | 0.2827  | -3.29                          | 0.1683  | -3.86     | 0.2552  |
| 67  | -4.00           | 0.2551  | -5.21                    | 0.0317 | -4.21                        | 0.2572  | -3.25                          | 0.1998  | -3.66     | 0.1375  |
| 68  | -3.92           | 0.2365  | -5.11                    | 0.0395 | -4.12                        | 0.2464  | -3.24                          | 0.1849  | -3.74     | 0.1422  |
| 69  | -3.83           | 0.2472  | -4.98                    | 0.0360 | -4.04                        | 0.2459  | -3.17                          | 0.2134  | -3.78     | 0.1553  |
| 70  | -3.76           | 0.2358  | -4.89                    | 0.0494 | -3.96                        | 0.2496  | -3.13                          | 0.1938  | -3.80     | 0.1524  |
| 71  | -3.67           | 0.2354  | -4.79                    | 0.0408 | -3.87                        | 0.2376  | -3.07                          | 0.2174  | -3.81     | 0.1556  |
| 72  | -3.57           | 0.2270  | -4.69                    | 0.0532 | -3.77                        | 0.2369  | -3.00                          | 0.2011  | -3.82     | 0.1468  |
| 73  | -3.49           | 0.2208  | -4.59                    | 0.0446 | -3.68                        | 0.2190  | -2.94                          | 0.2186  | -3.84     | 0.1492  |
| 74  | -3.40           | 0.2145  | -4.49                    | 0.0492 | -3.60                        | 0.2190  | -2.86                          | 0.2112  | -3.84     | 0.1527  |
| 75  | -3.31           | 0.1971  | -4.41                    | 0.0483 | -3.50                        | 0.1857  | -2.79                          | 0.2205  | -3.83     | 0.1369  |
| 76  | -3.22           | 0.2283  | -4.32                    | 0.0507 | -3.40                        | 0.2224  | -2.72                          | 0.2198  | -3.84     | 0.1438  |
| 77  | -3.13           | 0.2051  | -4.24                    | 0.0593 | -3.31                        | 0.2033  | -2.64                          | 0.2034  | -3.84     | 0.1378  |
| 78  | -3.04           | 0.1923  | -4.16                    | 0.0649 | -3.21                        | 0.1889  | -2.57                          | 0.1995  | -3.86     | 0.1555  |
| 79  | -2.95           | 0.1918  | -4.08                    | 0.0671 | -3.11                        | 0.1842  | -2.50                          | 0.2025  | -3.86     | 0.1496  |
| 80  | -2.84           | 0.1813  | -3.99                    | 0.0749 | -2.99                        | 0.1755  | -2.40                          | 0.1963  | -3.86     | 0.1534  |
| 81  | -2.74           | 0.1598  | -3.90                    | 0.0793 | -2.90                        | 0.1567  | -2.32                          | 0.1887  | -3.88     | 0.1319  |
| 82  | -2.64           | 0.1668  | -3.83                    | 0.0882 | -2.78                        | 0.1648  | -2.24                          | 0.1810  | -3.86     | 0.1540  |
| 83  | -2.54           | 0.1583  | -3.75                    | 0.0927 | -2.68                        | 0.1567  | -2.15                          | 0.1715  | -3.87     | 0.1463  |
| 84  | -2.44           | 0.1398  | -3.66                    | 0.0943 | -2.56                        | 0.1339  | -2.06                          | 0.1712  | -3.87     | 0.1518  |
| 85  | -2.34           | 0.1394  | -3.58                    | 0.1023 | -2.46                        | 0.1391  | -1.96                          | 0.1602  | -3.87     | 0.1395  |
| 86  | -2.22           | 0.1271  | -3.51                    | 0.1134 | -2.33                        | 0.1244  | -1.87                          | 0.1504  | -3.87     | 0.1717  |
| 87  | -2.13           | 0.1114  | -3.44                    | 0.1164 | -2.24                        | 0.1018  | -1.78                          | 0.1596  | -3.89     | 0.1499  |
| 88  | -2.02           | 0.1147  | -3.37                    | 0.1199 | -2.12                        | 0.0997  | -1.69                          | 0.1637  | -3.87     | 0.1554  |
| 89  | -1.92           | 0.0887  | -3.29                    | 0.1316 | -2.01                        | 0.0843  | -1.60                          | 0.1340  | -3.88     | 0.1364  |
| 90  | -1.81           | 0.0757  | -3.24                    | 0.1305 | -1.89                        | 0.0685  | -1.52                          | 0.1271  | -3.94     | 0.1701  |
| 91  | -1.72           | 0.0678  | -3.20                    | 0.1482 | -1.79                        | 0.0640  | -1.45                          | 0.1074  | -3.94     | 0.1291  |
| 92  | -1.62           | 0.0583  | -3.12                    | 0.1453 | -1.68                        | 0.0467  | -1.34                          | 0.1226  | -3.97     | 0.1171  |
| 93  | -1.53           | 0.0258  | -3.06                    | 0.1596 | -1.59                        | 0.0259  | -1.25                          | 0.0883  | -3.93     | 0.1567  |
| 94  | -1.44           | 0.0198  | -3.00                    | 0.1610 | -1.50                        | 0.0172  | -1.17                          | 0.0971  | -3.93     | 0.1263  |
| 95  | -1.35           | 0.0045  | -2.97                    | 0.1754 | -1.40                        | 0.0063  | -1.09                          | 0.0788  | -3.98     | 0.1298  |
| 96  | -1.28           | -0.0000 | -2.95                    | 0.1944 | -1.33                        | -0.0000 | -1.02                          | 0.0725  | -4.02     | 0.1859  |
| 97  | -1.20           | -0.0000 | -2.90                    | 0.1978 | -1.25                        | -0.0000 | -0.93                          | 0.0563  | -4.09     | 0.1446  |
| 98  | -1.16           | -0.0000 | -2.94                    | 0.2217 | -1.21                        | -0.0000 | -0.91                          | 0.0282  | -4.13     | 0.1165  |
| 99  | -1.14           | -0.0000 | -2.91                    | 0.2071 | -1.19                        | -0.0000 | -0.83                          | 0.0437  | -4.29     | 0.2782  |
| 100 | -1.11           | -0.0000 | -2.94                    | 0.2602 | -1.17                        | -0.0000 | -0.75                          | 0.0178  | -4.27     | 0.2767  |
| 101 | -1.15           | -0.0000 | -3.08                    | 0.2638 | -1.21                        | -0.0000 | -0.74                          | 0.0979  | -4.40     | 0.1235  |
| 102 | -1.23           | -0.0000 | -3.14                    | 0.2617 | -1.31                        | -0.0000 | -0.68                          | 0.0673  | -4.68     | 0.0901  |
| 103 | -1.40           | -0.0000 | -3.38                    | 0.3616 | -1.50                        | -0.0000 | -0.63                          | -0.0000 | -4.58     | 0.2190  |
| 104 | -1.58           | -0.0000 | -3.50                    | 0.3301 | -1.70                        | -0.0000 | -0.50                          | 0.0193  | -4.91     | -0.0000 |
| 105 | -1.94           | -0.0000 | -3.99                    | 0.3199 | -2.06                        | -0.0000 | -0.54                          | 0.1118  | -5.02     | 0.0930  |

**Panel B:**  $d$  in Lee carter model

| Total mortality | Cause-specific mortality | Mortality from healthy state | Mortality from unhealthy state | Incidence      |
|-----------------|--------------------------|------------------------------|--------------------------------|----------------|
| $k_t$ with SE   | $k_t$ with SE            | $k_t$ with SE                | $k_t$ with SE                  | $k_t$ with SE  |
| -0.063 (0.019)  | 0.359 (0.094)            | -0.091 (0.018)               | -0.112 (0.023)                 | -0.103 (0.166) |

**Panel C:**  $u_x$ ,  $b_x$ , and  $\alpha_x$  in autoregression model

| Age | Initial prevalence |            |             | Mortality from healthy state |             |             | Mortality from unhealthy state |             |             |
|-----|--------------------|------------|-------------|------------------------------|-------------|-------------|--------------------------------|-------------|-------------|
|     | $u_x$              | $b_x$      | $\alpha_x$  | $u_x$                        | $b_x$       | $\alpha_x$  | $u_x$                          | $b_x$       | $\alpha_x$  |
| 65  | -5.02(2.03)        | 2.57(1.01) | -0.86(0.13) | 0.69(0.04)                   | -0.34(0.02) | 0.00(0.24)  | 1.61(0.50)                     | -0.78(0.25) | -0.50(0.20) |
| 66  | -7.92(1.71)        | 4.02(0.86) | -0.86(0.15) | 0.78(0.06)                   | -0.38(0.03) | -0.54(0.20) | 1.64(0.17)                     | -0.80(0.09) | -0.29(0.23) |
| 67  | -9.50(1.81)        | 4.82(0.91) | -0.85(0.15) | 0.79(0.05)                   | -0.38(0.03) | -0.30(0.22) | 2.00(0.17)                     | -0.98(0.08) | -0.01(0.25) |
| 68  | -10.64(2.16)       | 5.39(1.08) | -0.85(0.16) | 0.85(0.03)                   | -0.41(0.02) | 0.17(0.24)  | 1.88(0.14)                     | -0.92(0.07) | -0.22(0.23) |
| 69  | -11.75(2.44)       | 5.95(1.22) | -0.86(0.18) | 0.89(0.05)                   | -0.44(0.03) | -0.19(0.24) | 2.25(0.20)                     | -1.10(0.10) | -0.21(0.24) |
| 70  | -13.13(1.92)       | 6.65(0.96) | -0.81(0.19) | 0.98(0.05)                   | -0.48(0.03) | -0.22(0.24) | 2.11(0.19)                     | -1.03(0.09) | -0.08(0.26) |
| 71  | -14.53(1.42)       | 7.34(0.71) | -0.79(0.18) | 1.03(0.03)                   | -0.51(0.01) | 0.40(0.21)  | 2.67(0.22)                     | -1.31(0.11) | -0.32(0.25) |
| 72  | -15.42(0.99)       | 7.79(0.49) | -0.71(0.19) | 1.14(0.05)                   | -0.56(0.02) | 0.09(0.24)  | 2.55(0.15)                     | -1.25(0.07) | -0.08(0.25) |
| 73  | -16.33(0.94)       | 8.25(0.47) | -0.78(0.15) | 1.17(0.05)                   | -0.57(0.03) | -0.31(0.22) | 3.10(0.18)                     | -1.52(0.09) | -0.20(0.24) |
| 74  | -16.64(0.81)       | 8.41(0.40) | -0.73(0.16) | 1.27(0.05)                   | -0.62(0.03) | 0.04(0.24)  | 3.21(0.09)                     | -1.57(0.04) | 0.14(0.24)  |
| 75  | -17.36(0.90)       | 8.77(0.45) | -0.82(0.13) | 1.17(0.06)                   | -0.57(0.03) | -0.15(0.24) | 3.55(0.11)                     | -1.74(0.06) | 0.07(0.24)  |
| 76  | -17.53(1.05)       | 8.86(0.53) | -0.78(0.15) | 1.55(0.05)                   | -0.76(0.02) | 0.15(0.24)  | 3.72(0.19)                     | -1.83(0.09) | -0.26(0.23) |
| 77  | -17.61(1.08)       | 8.90(0.54) | -0.80(0.16) | 1.57(0.06)                   | -0.76(0.03) | 0.22(0.23)  | 3.80(0.14)                     | -1.86(0.07) | 0.25(0.28)  |
| 78  | -17.89(1.20)       | 9.04(0.60) | -0.80(0.17) | 1.53(0.10)                   | -0.74(0.05) | -0.54(0.23) | 3.88(0.24)                     | -1.90(0.12) | -0.03(0.24) |
| 79  | -18.21(0.90)       | 9.20(0.45) | -0.69(0.21) | 1.71(0.09)                   | -0.83(0.05) | 0.03(0.24)  | 4.18(0.32)                     | -2.05(0.16) | -0.20(0.23) |
| 80  | -18.60(0.79)       | 9.39(0.40) | -0.58(0.23) | 1.83(0.11)                   | -0.89(0.05) | -0.07(0.24) | 4.31(0.38)                     | -2.11(0.19) | -0.33(0.22) |
| 81  | -19.18(0.79)       | 9.68(0.39) | -0.60(0.21) | 1.86(0.07)                   | -0.90(0.03) | 0.30(0.23)  | 4.63(0.41)                     | -2.26(0.21) | -0.45(0.22) |
| 82  | -19.28(0.52)       | 9.73(0.26) | -0.30(0.24) | 2.08(0.16)                   | -1.01(0.08) | -0.32(0.22) | 4.61(0.44)                     | -2.25(0.22) | -0.65(0.17) |
| 83  | -19.78(0.59)       | 9.98(0.30) | -0.55(0.20) | 1.96(0.33)                   | -0.95(0.16) | -0.64(0.18) | 5.12(0.29)                     | -2.50(0.15) | 0.21(0.24)  |
| 84  | -19.74(0.49)       | 9.96(0.24) | -0.39(0.22) | 1.91(0.31)                   | -0.92(0.15) | -0.54(0.19) | 5.58(0.30)                     | -2.72(0.15) | -0.25(0.23) |
| 85  | -19.49(0.47)       | 9.84(0.23) | -0.39(0.22) | 2.41(0.22)                   | -1.16(0.11) | -0.24(0.23) | 5.54(0.53)                     | -2.70(0.26) | -0.48(0.21) |
| 86  | -19.75(0.58)       | 9.96(0.29) | -0.47(0.21) | 2.24(0.47)                   | -1.07(0.23) | -0.64(0.19) | 5.46(0.75)                     | -2.65(0.37) | -0.36(0.22) |
| 87  | -19.61(0.58)       | 9.89(0.29) | -0.33(0.22) | 2.12(0.37)                   | -1.00(0.19) | -0.37(0.23) | 5.81(0.90)                     | -2.82(0.45) | -0.38(0.22) |
| 88  | -19.64(0.59)       | 9.91(0.29) | -0.47(0.21) | 1.99(0.74)                   | -0.94(0.37) | -0.68(0.18) | 6.29(1.14)                     | -3.05(0.57) | -0.48(0.20) |
| 89  | -19.51(0.64)       | 9.84(0.32) | -0.44(0.22) | 1.84(0.62)                   | -0.85(0.31) | -0.50(0.20) | 5.47(1.15)                     | -2.63(0.58) | -0.49(0.20) |
| 90  | -19.13(0.67)       | 9.65(0.34) | -0.50(0.21) | 1.46(0.94)                   | -0.66(0.47) | -0.66(0.18) | 6.80(0.82)                     | -3.29(0.41) | -0.02(0.24) |
| 91  | -18.95(0.84)       | 9.55(0.42) | -0.53(0.20) | 1.23(1.22)                   | -0.53(0.61) | -0.81(0.14) | 4.94(1.33)                     | -2.35(0.66) | -0.20(0.23) |
| 92  | -18.29(0.75)       | 9.22(0.37) | -0.38(0.23) | 1.33(0.86)                   | -0.57(0.43) | -0.42(0.23) | 4.69(2.74)                     | -2.21(1.37) | -0.73(0.16) |
| 93  | -18.13(0.70)       | 9.14(0.35) | -0.36(0.22) | -0.04(1.24)                  | 0.12(0.62)  | -0.64(0.18) | 4.55(1.46)                     | -2.13(0.73) | -0.18(0.23) |
| 94  | -18.13(0.64)       | 9.14(0.32) | -0.43(0.24) | 0.38(1.73)                   | -0.08(0.87) | -0.66(0.20) | 7.09(1.03)                     | -3.38(0.51) | 0.42(0.21)  |
| 95  | -18.57(1.04)       | 9.35(0.52) | -0.64(0.18) | -0.86(1.69)                  | 0.55(0.84)  | -0.63(0.18) | 5.51(1.60)                     | -2.59(0.80) | -0.26(0.23) |
| 96  | -17.46(0.74)       | 8.79(0.37) | -0.32(0.22) | -1.49(1.75)                  | 0.87(0.88)  | -0.68(0.18) | 3.45(2.50)                     | -1.55(1.25) | -0.15(0.24) |
| 97  | -16.75(0.66)       | 8.44(0.33) | -0.13(0.24) | -3.59(1.40)                  | 1.94(0.70)  | -0.29(0.22) | 4.08(1.90)                     | -1.84(0.95) | 0.13(0.24)  |
| 98  | -16.55(0.52)       | 8.33(0.26) | 0.10(0.23)  | -4.38(2.49)                  | 2.34(1.24)  | -0.60(0.20) | 0.94(1.97)                     | -0.27(0.99) | 0.32(0.22)  |
| 99  | -16.07(0.63)       | 8.09(0.32) | 0.08(0.24)  | -8.32(1.81)                  | 4.31(0.90)  | -0.37(0.24) | 5.67(3.20)                     | -2.62(1.60) | 0.20(0.23)  |
| 100 | -16.78(1.03)       | 8.44(0.51) | -0.46(0.24) | -13.57(2.11)                 | 6.93(1.05)  | -0.22(0.23) | -0.86(3.17)                    | 0.66(1.58)  | 0.32(0.24)  |
| 101 | -16.91(1.63)       | 8.50(0.82) | -0.55(0.22) | -15.92(3.42)                 | 8.10(1.71)  | -0.37(0.22) | 4.44(7.51)                     | -1.98(3.75) | -0.29(0.23) |
| 102 | -15.41(2.24)       | 7.74(1.12) | -0.62(0.20) | -20.88(5.09)                 | 10.56(2.54) | -0.68(0.17) | 8.34(4.77)                     | -3.91(2.38) | 0.36(0.22)  |
| 103 | -13.04(2.06)       | 6.55(1.03) | -0.54(0.20) | -16.96(6.69)                 | 8.58(3.34)  | -0.73(0.16) | -6.98(16.2)                    | 3.74(8.10)  | -0.32(0.22) |
| 104 | -10.42(1.89)       | 5.23(0.95) | -0.45(0.21) | -22.65(8.41)                 | 11.41(4.20) | -0.77(0.16) | -24.42(20.0)                   | 12.47(9.97) | -0.27(0.23) |
| 105 | -0.68(0.24)        | 0.34(0.12) | -0.74(0.17) | -19.39(8.03)                 | 9.76(4.01)  | -0.75(0.18) | -4.86(15.6)                    | 2.71(7.78)  | -0.03(0.24) |

**Panel D:**  $u_x$ ,  $b_x$ , and  $\alpha_x$  in autoregression model

| Age | Incidence   |             |             | Total mortality |             |             | Cause-specific mortality |            |             |
|-----|-------------|-------------|-------------|-----------------|-------------|-------------|--------------------------|------------|-------------|
|     | $u_x$       | $b_x$       | $\alpha_x$  | $u_x$           | $b_x$       | $\alpha_x$  | $u_x$                    | $b_x$      | $\alpha_x$  |
| 65  | -0.35(0.13) | 0.17(0.07)  | -0.69(0.17) | 0.60(0.08)      | -0.29(0.04) | -0.46(0.21) | -0.08(0.05)              | 0.04(0.03) | -0.60(0.20) |
| 66  | -1.94(0.58) | 0.98(0.29)  | -0.61(0.18) | 0.68(0.06)      | -0.33(0.03) | -0.56(0.19) | -0.10(0.03)              | 0.05(0.01) | -0.43(0.24) |
| 67  | -0.05(0.53) | 0.04(0.26)  | -0.67(0.18) | 0.73(0.05)      | -0.35(0.02) | -0.29(0.23) | -0.09(0.04)              | 0.05(0.02) | -0.39(0.22) |
| 68  | 0.21(0.57)  | -0.09(0.28) | -0.71(0.17) | 0.77(0.03)      | -0.37(0.02) | 0.24(0.23)  | -0.13(0.05)              | 0.07(0.02) | -0.50(0.26) |
| 69  | 0.32(0.59)  | -0.15(0.30) | -0.76(0.15) | 0.83(0.06)      | -0.40(0.03) | -0.13(0.23) | -0.12(0.05)              | 0.06(0.02) | -0.35(0.24) |
| 70  | 0.31(0.56)  | -0.14(0.28) | -0.75(0.15) | 0.84(0.07)      | -0.41(0.04) | -0.38(0.22) | -0.20(0.04)              | 0.10(0.02) | -0.31(0.23) |
| 71  | 0.55(0.62)  | -0.26(0.31) | -0.77(0.15) | 0.96(0.05)      | -0.47(0.02) | 0.01(0.24)  | -0.19(0.05)              | 0.10(0.02) | -0.58(0.20) |
| 72  | 0.51(0.57)  | -0.24(0.29) | -0.71(0.17) | 1.01(0.06)      | -0.49(0.03) | -0.05(0.24) | -0.27(0.06)              | 0.14(0.03) | -0.46(0.21) |
| 73  | 0.68(0.61)  | -0.33(0.31) | -0.77(0.14) | 1.09(0.07)      | -0.53(0.03) | -0.29(0.23) | -0.24(0.05)              | 0.13(0.03) | -0.33(0.23) |
| 74  | 0.64(0.61)  | -0.31(0.31) | -0.76(0.15) | 1.17(0.05)      | -0.57(0.03) | -0.04(0.24) | -0.33(0.10)              | 0.17(0.05) | -0.74(0.17) |
| 75  | 0.64(0.57)  | -0.31(0.28) | -0.76(0.15) | 1.09(0.10)      | -0.52(0.05) | -0.57(0.19) | -0.36(0.12)              | 0.18(0.06) | -0.77(0.16) |
| 76  | 0.69(0.60)  | -0.34(0.30) | -0.79(0.14) | 1.40(0.10)      | -0.68(0.05) | -0.44(0.21) | -0.44(0.16)              | 0.23(0.08) | -0.83(0.14) |
| 77  | 0.52(0.54)  | -0.25(0.27) | -0.73(0.15) | 1.40(0.10)      | -0.68(0.05) | -0.16(0.24) | -0.53(0.13)              | 0.27(0.06) | -0.71(0.16) |
| 78  | 0.62(0.61)  | -0.30(0.30) | -0.77(0.15) | 1.37(0.14)      | -0.66(0.07) | -0.52(0.20) | -0.57(0.17)              | 0.29(0.08) | -0.71(0.17) |
| 79  | 0.38(0.53)  | -0.18(0.27) | -0.67(0.18) | 1.55(0.14)      | -0.75(0.07) | -0.18(0.23) | -0.62(0.18)              | 0.32(0.09) | -0.69(0.18) |
| 80  | 0.30(0.51)  | -0.14(0.25) | -0.62(0.18) | 1.55(0.20)      | -0.74(0.10) | -0.43(0.21) | -0.83(0.23)              | 0.43(0.12) | -0.82(0.14) |
| 81  | 0.38(0.47)  | -0.18(0.23) | -0.70(0.17) | 1.56(0.16)      | -0.75(0.08) | -0.41(0.21) | -0.97(0.20)              | 0.49(0.10) | -0.79(0.14) |
| 82  | 0.56(0.60)  | -0.27(0.30) | -0.75(0.15) | 1.63(0.30)      | -0.78(0.15) | -0.72(0.16) | -1.10(0.32)              | 0.56(0.16) | -0.89(0.13) |
| 83  | 0.12(0.42)  | -0.05(0.21) | -0.48(0.22) | 1.64(0.36)      | -0.78(0.18) | -0.55(0.19) | -1.22(0.14)              | 0.62(0.07) | -0.34(0.22) |
| 84  | 0.22(0.48)  | -0.10(0.24) | -0.60(0.19) | 1.47(0.43)      | -0.69(0.21) | -0.72(0.16) | -1.49(0.24)              | 0.75(0.12) | -0.83(0.13) |
| 85  | 0.12(0.41)  | -0.05(0.20) | -0.56(0.20) | 1.92(0.37)      | -0.91(0.19) | -0.55(0.20) | -1.57(0.31)              | 0.80(0.16) | -0.78(0.17) |
| 86  | 0.11(0.55)  | -0.04(0.27) | -0.68(0.17) | 1.71(0.62)      | -0.80(0.31) | -0.70(0.18) | -1.88(0.28)              | 0.96(0.14) | -0.62(0.19) |
| 87  | -0.06(0.39) | 0.04(0.20)  | -0.47(0.22) | 1.54(0.60)      | -0.71(0.30) | -0.59(0.19) | -2.18(0.34)              | 1.11(0.17) | -0.64(0.18) |
| 88  | -0.23(0.36) | 0.13(0.18)  | -0.41(0.22) | 1.43(1.00)      | -0.65(0.50) | -0.76(0.15) | -2.31(0.38)              | 1.17(0.19) | -0.62(0.19) |
| 89  | 0.12(0.43)  | -0.05(0.22) | -0.57(0.21) | 1.09(0.81)      | -0.47(0.41) | -0.62(0.18) | -2.82(0.31)              | 1.43(0.15) | -0.59(0.18) |
| 90  | -0.20(0.36) | 0.11(0.18)  | -0.37(0.23) | 0.98(1.03)      | -0.41(0.51) | -0.76(0.15) | -2.87(0.22)              | 1.45(0.11) | -0.36(0.22) |
| 91  | -0.13(0.26) | 0.07(0.13)  | -0.04(0.25) | 0.67(1.30)      | -0.25(0.65) | -0.76(0.16) | -3.31(0.30)              | 1.68(0.15) | -0.28(0.23) |
| 92  | -0.24(0.24) | 0.13(0.12)  | -0.20(0.24) | 0.57(1.39)      | -0.19(0.69) | -0.70(0.18) | -3.67(0.54)              | 1.86(0.27) | -0.70(0.17) |
| 93  | -0.24(0.34) | 0.13(0.17)  | -0.30(0.26) | -1.11(1.63)     | 0.66(0.81)  | -0.78(0.14) | -4.23(0.41)              | 2.14(0.21) | -0.57(0.19) |
| 94  | -0.30(0.30) | 0.16(0.15)  | -0.38(0.25) | -0.42(1.63)     | 0.33(0.81)  | -0.62(0.20) | -4.33(0.31)              | 2.19(0.16) | -0.09(0.23) |
| 95  | -0.30(0.28) | 0.16(0.14)  | -0.21(0.25) | -1.55(1.84)     | 0.90(0.92)  | -0.64(0.18) | -4.97(0.41)              | 2.51(0.20) | -0.35(0.22) |
| 96  | -0.24(0.42) | 0.13(0.21)  | -0.37(0.23) | -2.29(2.08)     | 1.28(1.04)  | -0.71(0.17) | -5.60(0.60)              | 2.83(0.30) | -0.58(0.19) |
| 97  | -0.38(0.23) | 0.20(0.12)  | -0.05(0.24) | -4.29(1.55)     | 2.29(0.78)  | -0.28(0.23) | -5.87(0.44)              | 2.96(0.22) | 0.08(0.24)  |
| 98  | -0.29(0.28) | 0.15(0.14)  | -0.15(0.26) | -5.19(2.47)     | 2.75(1.23)  | -0.65(0.19) | -6.40(0.30)              | 3.22(0.15) | 0.27(0.23)  |
| 99  | -1.04(0.32) | 0.53(0.16)  | 0.03(0.25)  | -8.81(1.76)     | 4.56(0.88)  | -0.30(0.25) | -6.54(0.30)              | 3.29(0.15) | 0.41(0.22)  |
| 100 | -1.04(0.42) | 0.53(0.21)  | -0.15(0.25) | -14.30(1.98)    | 7.30(0.99)  | -0.20(0.24) | -7.79(0.32)              | 3.92(0.16) | 0.27(0.24)  |
| 101 | -0.71(0.27) | 0.36(0.14)  | 0.12(0.23)  | -15.73(2.54)    | 8.01(1.27)  | -0.24(0.23) | -6.76(0.48)              | 3.40(0.24) | 0.02(0.24)  |
| 102 | -0.31(0.24) | 0.16(0.12)  | 0.15(0.24)  | -21.10(4.81)    | 10.69(2.40) | -0.71(0.16) | -7.34(1.09)              | 3.69(0.54) | -0.45(0.26) |
| 103 | -0.66(0.32) | 0.33(0.16)  | 0.21(0.25)  | -19.80(7.02)    | 10.02(3.51) | -0.72(0.16) | -7.72(1.80)              | 3.88(0.90) | -0.57(0.20) |
| 104 | 0.32(0.34)  | -0.16(0.17) | -0.03(0.24) | -26.66(8.85)    | 13.42(4.42) | -0.81(0.15) | -7.26(1.74)              | 3.64(0.87) | -0.66(0.20) |
| 105 | -0.80(0.29) | 0.40(0.15)  | 0.11(0.24)  | -21.90(8.51)    | 11.02(4.25) | -0.75(0.19) | -4.17(0.87)              | 2.09(0.44) | -0.28(0.27) |

**Panel E:**  $u_x$ ,  $b_x$ , and  $\alpha_x$  in autoregression model

| Age | Fraction     |             |             | Hazard Ratio |              |             |
|-----|--------------|-------------|-------------|--------------|--------------|-------------|
|     | $u_x$        | $b_x$       | $\alpha_x$  | $u_x$        | $b_x$        | $\alpha_x$  |
| 65  | -14.93(1.58) | 7.59(0.79)  | -0.27(0.23) | -32.37(26.8) | 17.74(13.4)  | -0.23(0.24) |
| 66  | -17.39(1.67) | 8.83(0.83)  | -0.44(0.23) | -35.81(9.70) | 19.24(4.84)  | 0.05(0.24)  |
| 67  | -16.39(2.03) | 8.34(1.01)  | -0.40(0.22) | -2.89(11.4)  | 2.74(5.67)   | 0.13(0.24)  |
| 68  | -17.19(2.29) | 8.74(1.14)  | -0.60(0.28) | -6.20(7.71)  | 4.31(3.85)   | -0.08(0.24) |
| 69  | -17.21(1.65) | 8.76(0.82)  | -0.45(0.25) | 9.64(8.75)   | -3.63(4.37)  | -0.08(0.24) |
| 70  | -20.08(1.05) | 10.20(0.52) | -0.05(0.25) | -4.03(5.39)  | 3.16(2.69)   | 0.40(0.23)  |
| 71  | -19.12(0.80) | 9.71(0.40)  | -0.14(0.24) | 17.37(7.52)  | -7.57(3.76)  | 0.05(0.27)  |
| 72  | -20.65(1.02) | 10.48(0.51) | -0.20(0.24) | 6.99(4.68)   | -2.42(2.34)  | 0.29(0.23)  |
| 73  | -19.42(0.75) | 9.87(0.37)  | -0.12(0.24) | 25.62(6.67)  | -11.74(3.33) | -0.24(0.24) |
| 74  | -20.28(1.12) | 10.30(0.56) | -0.33(0.24) | 22.09(3.38)  | -9.98(1.69)  | 0.31(0.22)  |
| 75  | -18.42(1.00) | 9.37(0.50)  | -0.18(0.24) | 39.86(4.83)  | -18.90(2.41) | 0.14(0.23)  |
| 76  | -20.59(1.23) | 10.45(0.62) | -0.40(0.22) | 23.10(3.90)  | -10.54(1.95) | 0.28(0.23)  |
| 77  | -20.99(1.25) | 10.65(0.62) | -0.49(0.20) | 22.73(3.05)  | -10.39(1.52) | 0.55(0.24)  |
| 78  | -20.57(1.84) | 10.44(0.92) | -0.61(0.21) | 23.23(5.32)  | -10.66(2.66) | -0.03(0.24) |
| 79  | -20.66(1.61) | 10.48(0.80) | -0.56(0.21) | 25.86(5.82)  | -12.00(2.91) | -0.05(0.24) |
| 80  | -21.44(1.73) | 10.87(0.87) | -0.66(0.19) | 24.00(7.79)  | -11.09(3.89) | -0.39(0.22) |
| 81  | -21.42(1.35) | 10.86(0.67) | -0.50(0.21) | 28.13(6.03)  | -13.16(3.01) | -0.16(0.24) |
| 82  | -22.26(1.53) | 11.27(0.76) | -0.53(0.23) | 20.36(6.21)  | -9.31(3.10)  | -0.37(0.22) |
| 83  | -22.32(0.60) | 11.30(0.30) | 0.10(0.24)  | 21.60(4.88)  | -9.95(2.44)  | -0.07(0.24) |
| 84  | -21.56(0.64) | 10.92(0.32) | -0.33(0.24) | 29.70(2.96)  | -14.00(1.48) | 0.10(0.23)  |
| 85  | -22.27(0.98) | 11.27(0.49) | -0.44(0.24) | 19.02(2.89)  | -8.68(1.44)  | 0.14(0.24)  |
| 86  | -22.37(0.89) | 11.32(0.44) | -0.31(0.22) | 19.43(6.39)  | -8.91(3.19)  | -0.20(0.23) |
| 87  | -21.48(1.08) | 10.87(0.54) | -0.26(0.23) | 27.29(4.71)  | -12.84(2.35) | -0.04(0.27) |
| 88  | -20.99(0.90) | 10.62(0.45) | -0.12(0.23) | 27.99(4.02)  | -13.21(2.01) | 0.11(0.24)  |
| 89  | -21.25(0.74) | 10.75(0.37) | -0.15(0.23) | 22.09(5.55)  | -10.28(2.77) | -0.26(0.23) |
| 90  | -19.94(0.55) | 10.08(0.28) | 0.22(0.23)  | 29.52(6.08)  | -14.02(3.04) | 0.14(0.23)  |
| 91  | -20.45(0.73) | 10.33(0.36) | 0.06(0.24)  | 15.97(4.19)  | -7.27(2.09)  | 0.20(0.23)  |
| 92  | -19.52(1.53) | 9.86(0.77)  | -0.49(0.20) | 22.56(7.16)  | -10.57(3.57) | -0.25(0.23) |
| 93  | -19.13(0.67) | 9.67(0.33)  | 0.09(0.24)  | 21.79(2.19)  | -10.19(1.09) | 0.66(0.17)  |
| 94  | -18.48(1.01) | 9.34(0.50)  | -0.06(0.25) | 31.89(6.22)  | -15.23(3.11) | 0.17(0.25)  |
| 95  | -18.49(0.56) | 9.34(0.28)  | 0.12(0.23)  | 27.14(4.84)  | -12.87(2.42) | -0.09(0.24) |
| 96  | -19.05(1.32) | 9.62(0.66)  | -0.43(0.21) | 22.66(4.84)  | -10.64(2.42) | 0.33(0.22)  |
| 97  | -17.19(1.00) | 8.68(0.50)  | 0.11(0.24)  | 33.90(4.48)  | -16.25(2.24) | 0.26(0.24)  |
| 98  | -17.25(0.98) | 8.71(0.49)  | 0.21(0.23)  | 30.93(8.62)  | -14.77(4.31) | 0.25(0.23)  |
| 99  | -15.19(0.67) | 7.68(0.33)  | 0.52(0.20)  | 67.31(11.0)  | -32.89(5.50) | 0.24(0.23)  |
| 100 | -16.35(0.96) | 8.25(0.48)  | 0.27(0.23)  | 67.30(15.9)  | -32.83(7.95) | 0.11(0.24)  |
| 101 | -13.79(2.32) | 6.97(1.16)  | -0.21(0.23) | 90.29(45.3)  | -44.28(22.6) | -0.50(0.20) |
| 102 | -12.48(1.04) | 6.31(0.52)  | 0.44(0.22)  | 178.10(33.8) | -87.93(16.9) | 0.20(0.23)  |
| 103 | -16.32(2.56) | 8.23(1.28)  | -0.09(0.23) | 120.34(126)  | -58.88(63.1) | -0.58(0.19) |
| 104 | -15.58(5.13) | 7.86(2.56)  | -0.21(0.23) | 59.25(200)   | -27.91(99.9) | -0.17(0.23) |
| 105 | -9.96(3.31)  | 5.04(1.65)  | 0.08(0.24)  | 279.70(328)  | -137.1(164)  | -0.42(0.21) |
